# Supplementary material for: The preparation of rare earth phosphate fine particles in an emulsion liquid membrane systemElectronic supplementary information (ESI) available: SEM images of phosphate particles prepared in the homogeneous system, and SEM images of La phosphate particles prepared via the ELM system, following calcination for 2 h at 573 and 1373 K. See http://www.rsc.org/suppdata/jm/b1/b105743j/
Source: Royal Society of Chemistry journal article supplement (doi:10.1039/b105743j), 2002-03-04
Supplement: b105743j_s1.doc [file b105743j_s1.doc]

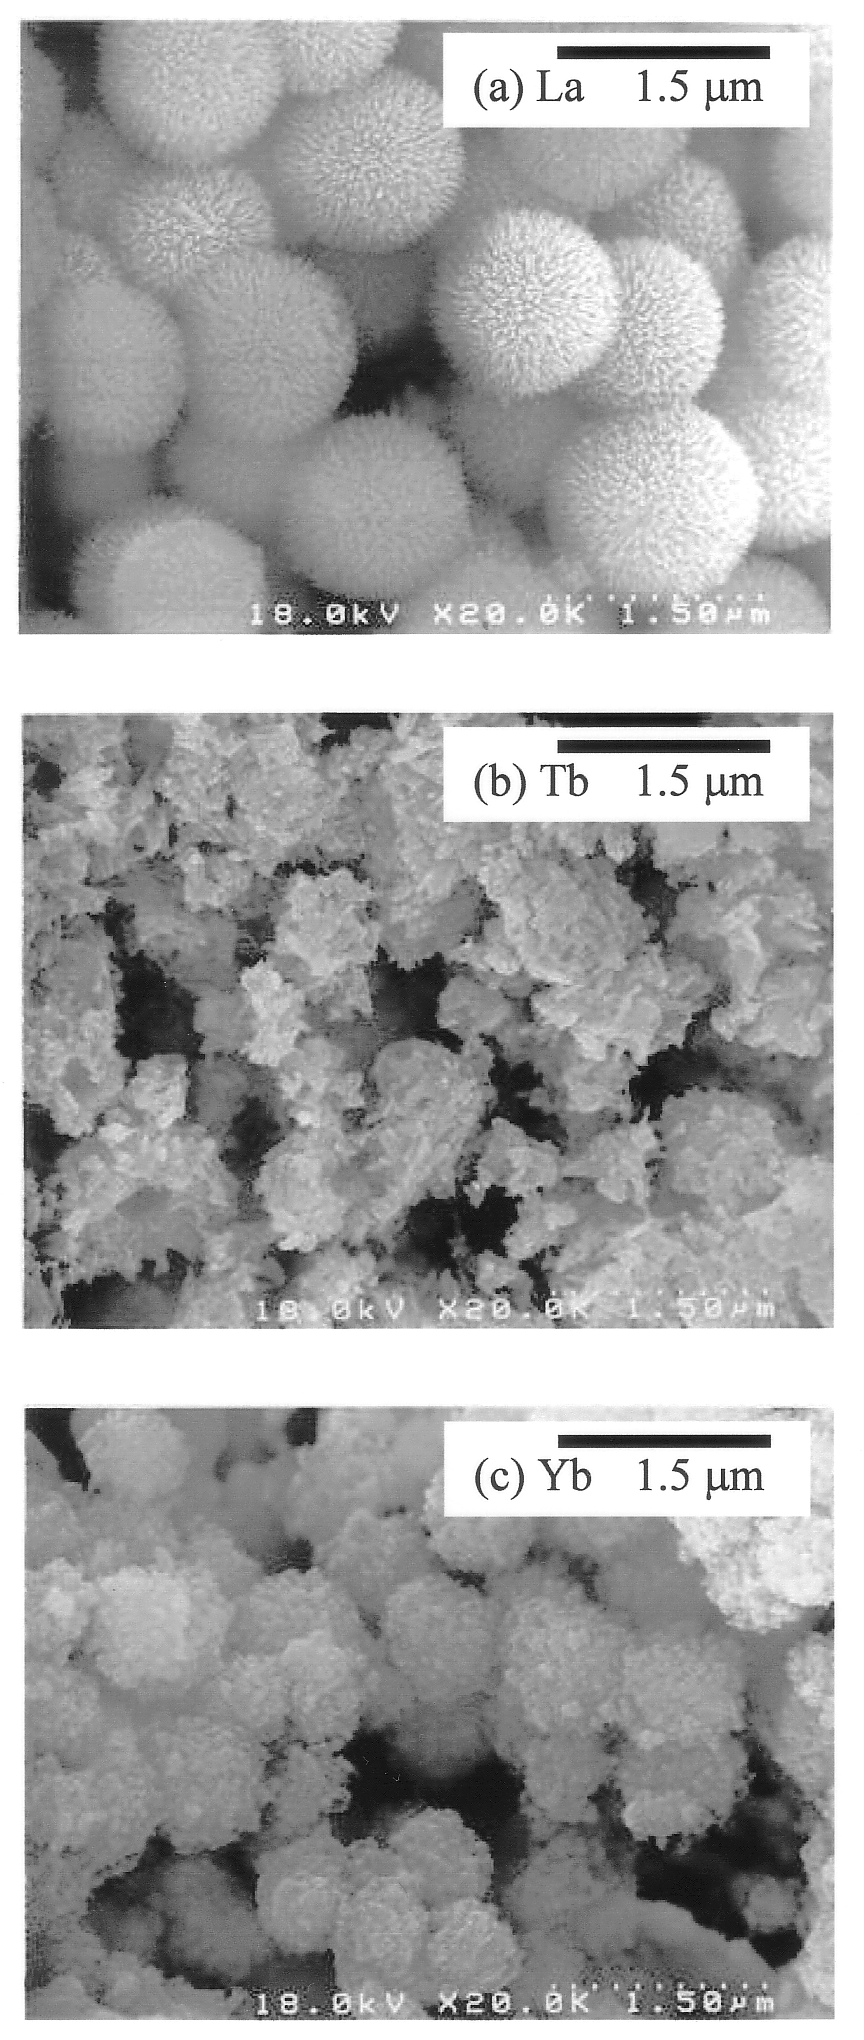


**Fig. S1** Scanning electron micrographs of phosphate particles for (a) La, (b) Tb, and (c) Yb, prepared in the homogeneous system, without calcination. [H3PO4]feed = 0.3 mol l–1 and [Ln]feed = 0.01 mol l–1.
